# Supplementary material for: Analyzing the Material Basis of Anti-RSV Efficacy of Lonicerae japonicae Flos Based on the PK-PD Model
Source: MDPI journal article supplement (doi:10.3390/molecules28186437), 2023-09-05
Supplement: s1 [file s1]

## Supplementary Materials

Table S1 The stability of the 15 compounds in plasma (n = 6).

| Components             | Concentration<br>(ng/mL) | Short term stability |     | 24 h stability |     | Long term stability |     | Repeated freezing and thawing stability |     |
|------------------------|--------------------------|----------------------|-----|----------------|-----|---------------------|-----|-----------------------------------------|-----|
|                        |                          | Mean ± SD            | RSD | Mean ± SD      | RSD | Mean ± SD           | RSD | Mean ± SD                               | RSD |
|                        |                          | %                    | %   | %              | %   | %                   | %   | %                                       | %   |
| Secologanic acid       | 100                      | 98.2±5.1             | 5.2 | 94.3±4.1       | 4.3 | 87.3±5.6            | 6.4 | 90.2±4.6                                | 5.1 |
|                        | 8000                     | 97.3±6.3             | 6.5 | 96.3±7.3       | 7.6 | 89.5±6.2            | 6.9 | 92.4±5.1                                | 5.5 |
|                        | 30000                    | 96.4±4.5             | 4.7 | 91.4±6.6       | 7.2 | 88.3±3.6            | 4.1 | 87.2±4.7                                | 5.4 |
| Sweroside              | 6.25                     | 95.2±6.4             | 6.7 | 92.2±3.3       | 3.6 | 89.5±5.4            | 6.0 | 88.4±4.6                                | 5.2 |
|                        | 5000                     | 98.3±7.0             | 7.1 | 95.3±6.6       | 6.9 | 90.1±4.8            | 5.3 | 89.5±4.6                                | 5.1 |
|                        | 18750                    | 97.4±5.3             | 5.4 | 96.4±5.4       | 5.6 | 87.4±6.2            | 7.1 | 90.8±4.2                                | 4.6 |
| Cryptochlorogenic acid | 6.25                     | 96.5±6.6             | 6.8 | 91.4±5.7       | 6.2 | 89.4±4.5            | 5.0 | 92.3±4.3                                | 4.7 |
|                        | 2000                     | 94.2±4.3             | 4.6 | 92.8±6.2       | 6.7 | 89.8±5.4            | 6.0 | 91.5±3.7                                | 4.0 |
|                        | 5000                     | 97.4±5.8             | 6.0 | 93.4±4.7       | 5.0 | 87.6±3.6            | 4.1 | 90.2±6.8                                | 7.5 |
| Luteoloside            | 6.25                     | 99.5±4.6             | 4.6 | 96.4±6.7       | 7.0 | 90.7±5.6            | 6.2 | 92.6±4.5                                | 4.9 |
|                        | 100                      | 97.3±8.2             | 8.4 | 91.3±3.4       | 3.7 | 87.3±4.9            | 5.6 | 90.2±4.6                                | 5.1 |
|                        | 1000                     | 100.2±2.9            | 2.9 | 98.2±3.9       | 4.0 | 90.8±8.6            | 9.5 | 94.3±5.8                                | 6.2 |
| Isochlorogenic acid B  | 500                      | 100.3±6.5            | 6.5 | 96.3±5.5       | 5.7 | 92.4±6.3            | 6.8 | 91.5±3.7                                | 4.0 |
|                        | 5000                     | 94.9±4.3             | 4.5 | 92.1±3.2       | 3.5 | 89.1±5.4            | 6.1 | 90.1±5.2                                | 5.7 |
|                        | 18750                    | 95.2±2.1             | 2.2 | 90.2±4.1       | 4.5 | 88.2±4.1            | 4.6 | 91.2±5.4                                | 5.9 |
| Swertiamarin           | 400                      | 98.2±4.9             | 5.0 | 91.4±3.6       | 3.9 | 88.5±5.3            | 6.0 | 90.1±4.2                                | 4.7 |
|                        | 4000                     | 99.1±6.6             | 6.7 | 93.1±5.4       | 5.8 | 89.1±4.3            | 4.8 | 92.3±2.9                                | 3.1 |

|                       |       |           |     |          |     |          |      |          |     |
|-----------------------|-------|-----------|-----|----------|-----|----------|------|----------|-----|
|                       | 15000 | 98.1±8.7  | 8.9 | 90.1±5.4 | 6.0 | 87.7±8.1 | 9.2  | 92.3±4.1 | 4.4 |
|                       | 6.25  | 101.2±3.9 | 3.9 | 92.5±5.9 | 6.4 | 89.5±3.6 | 4.02 | 94.5±4.5 | 4.8 |
| Luteolin              | 200   | 103.8±6.3 | 6.2 | 96.8±4.5 | 4.6 | 90.5±6.2 | 6.8  | 92.4±6.0 | 6.5 |
|                       | 3000  | 98.5±6.7  | 6.8 | 93.2±4.1 | 4.4 | 87.3±6.3 | 7.2  | 90.8±2.2 | 2.4 |
|                       | 50    | 97.3±8.2  | 8.4 | 91.5±2.8 | 3.0 | 85.5±3.4 | 4.0  | 92.6±4.3 | 4.6 |
| Isoquercitrin         | 200   | 92.1±4.3  | 4.7 | 89.1±2.3 | 2.6 | 87.3±4.2 | 4.8  | 90.8±5.6 | 6.2 |
|                       | 3000  | 97.2±4.8  | 4.9 | 88.6±4.5 | 5.1 | 86.3±5.3 | 6.1  | 92.5±5.1 | 5.5 |
|                       | 200   | 91.2±1.6  | 1.8 | 86.2±2.7 | 3.1 | 85.6±4.1 | 4.8  | 88.6±4.3 | 4.9 |
| Isochlorogenic acid C | 4000  | 102.3±4.7 | 4.6 | 92.3±3.9 | 4.2 | 89.3±5.3 | 5.9  | 90.2±4.9 | 5.4 |
|                       | 7500  | 101.1±5.2 | 5.2 | 91.1±4.5 | 4.9 | 88.1±6.2 | 7.0  | 92.8±3.1 | 3.3 |
|                       | 10    | 99.3±4.3  | 4.3 | 93.2±5.2 | 5.6 | 89.1±4.8 | 5.4  | 92.1±6.8 | 7.4 |
| Secoxyloganin         | 400   | 98.2±4.5  | 4.6 | 91.2±3.4 | 3.7 | 86.6±6.5 | 7.5  | 95.6±5.4 | 5.6 |
|                       | 30000 | 96.3±7.4  | 7.7 | 91.3±5.3 | 5.8 | 88.7±7.4 | 8.3  | 89.5±6.3 | 7.0 |
|                       | 400   | 98.2±6.8  | 6.9 | 93.1±3.8 | 4.1 | 87.5±4.6 | 5.3  | 90.5±5.8 | 6.4 |
| Caffeic acid          | 4000  | 94.5±6.6  | 7.0 | 87.6±2.8 | 3.2 | 86.3±4.7 | 5.4  | 91.2±4.9 | 5.4 |
|                       | 15000 | 94.3±4.8  | 5.1 | 88.3±5.6 | 6.3 | 87.1±5.1 | 5.9  | 90.8±6.6 | 7.3 |
|                       | 3.75  | 97.6±7.1  | 7.3 | 91.6±5.2 | 5.7 | 85.9±6.4 | 7.5  | 92.3±6.2 | 6.7 |
| Chlorogenic acid      | 300   | 97.2±5.6  | 5.8 | 94.6±6.2 | 6.6 | 89.6±7.1 | 7.9  | 92.6±4.5 | 4.9 |
|                       | 5625  | 96.3±5.4  | 5.6 | 92.3±3.5 | 3.8 | 88.3±4.6 | 5.2  | 90.5±5.5 | 6.1 |
|                       | 100   | 95.4±5.8  | 6.2 | 90.4±4.8 | 5.3 | 89.2±5.2 | 5.8  | 92.6±4.4 | 4.8 |
| Loganic acid          | 2000  | 94.3±6.2  | 6.6 | 88.5±5.4 | 6.1 | 86.6±6.3 | 7.3  | 91.2±7.3 | 8.0 |
|                       | 7500  | 97.5±3.4  | 3.5 | 91.6±4.5 | 4.9 | 89.4±5.1 | 5.7  | 91.6±8.2 | 9.0 |
|                       | 400   | 96.3±5.6  | 5.8 | 89.4±4.7 | 5.3 | 87.5±5.3 | 6.1  | 90.8±5.9 | 6.5 |
| Isochlorogenic acid A | 5000  | 98.6±2.5  | 2.5 | 90.5±5.1 | 5.6 | 87.5±6.5 | 7.4  | 93.6±4.5 | 4.8 |
|                       | 15000 | 99.4±5.4  | 5.4 | 87.3±3.7 | 4.2 | 86.1±5.1 | 5.9  | 94.5±5.8 | 6.1 |

|       |      |          |     |          |     |          |     |          |     |
|-------|------|----------|-----|----------|-----|----------|-----|----------|-----|
| Rutin | 5    | 97.8±5.3 | 5.4 | 89.9±5.3 | 5.9 | 87.6±4.5 | 5.1 | 95.6±4.8 | 5.0 |
|       | 200  | 97.5±6.1 | 6.3 | 88.6±4.5 | 5.1 | 86.9±3.6 | 4.2 | 93.2±6.3 | 6.8 |
|       | 3000 | 98.4±3.7 | 3.8 | 95.3±5.1 | 5.4 | 89.4±6.3 | 7.0 | 91.5±4.1 | 4.5 |

**Table S2.** The comprehensive score of pharmacodynamic index value entropy method.

| Time (h) | E%         |        |               | Comprehensive weight score |
|----------|------------|--------|---------------|----------------------------|
|          | Lung index | IL-6   | IFN- $\gamma$ | S                          |
| 0.25     | 0.2037     | 0.1515 | 4.5951        | 0.0109                     |
| 0.5      | 1.7213     | 0.5825 | 1.5736        | 0.0064                     |
| 0.75     | 4.5223     | 3.1324 | 3.5757        | 0.0255                     |
| 1        | 4.5672     | 3.9497 | 3.8490        | 0.0290                     |
| 1.5      | 1.6378     | 0.0339 | 0.0349        | 0.0029                     |
| 2        | 3.8842     | 3.4983 | 3.5448        | 0.0243                     |
| 3        | 0.8043     | 3.2398 | 3.3743        | 0.0153                     |
| 4        | 1.9507     | 3.9154 | 3.7876        | 0.0210                     |
| 6        | 2.0811     | 2.8981 | 3.0669        | 0.0162                     |
| 8        | 1.0543     | 0.9386 | 1.4969        | 0.0055                     |
| 12       | 4.1837     | 3.1547 | 3.3242        | 0.0237                     |
| 24       | 4.3369     | 3.4858 | 3.8358        | 0.0266                     |
